# Supplementary material for: Endosome–mitochondria interactions are modulated by iron release from transferrin
Source: PubMed Central journal article supplement — J Cell Biol. 2016 Sep 26;214(7):831–45. doi: 10.1083/jcb.201602069 (PMC5037410; doi:10.1083/jcb.201602069), 2016-09-26
Supplement: JCB_201602069_sm.pdf [file JCB_201602069_sm.pdf]

Das et al., <http://www.jcb.org/cgi/content/full/jcb.201602069/DC1>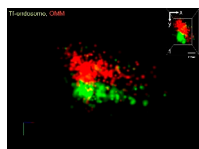

Video 1. 3D dSTORM images (ROIs 1–3; Fig. 1 B) with rotated viewing to demonstrate interactions between Tf-endosomes and the OMM; ROI 4 shows noninteraction.

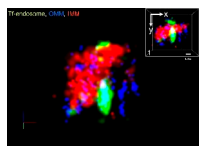

Video 2. Triple-labeled (Tf, OMM, and IMM) 3D dSTORM images (ROIs 1–3; Fig. 1 D) with rotated viewing to demonstrate interactions between Tf-endosomes and respective mitochondria.

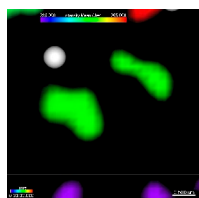

Video 3. Quenching of mitochondrial intensity upon interaction by a Tf-endosome. See Fig. 3 A.

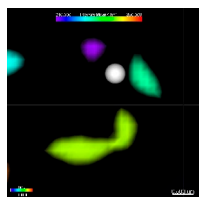

Video 4. A second Tf-endosome-mitochondria kiss and run event resulting in quenching of mitochondrial intensity upon endosomal interaction. See Fig. 3 B.

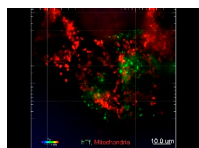

Video 5. Fluorescence, 3D-rendered, and 3D-rendered with kiss and run filtered hTf-endosomes (Fig. 4 A, a–c) of 15-s time-lapse duration (139-ms interval) of MDCK-PTR cells labeled with MitoTracker orange and 2-min pulse with AF488-hTf followed by a 2-min chase with nonfluorescent imaging medium.

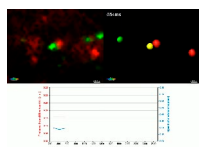

Video 6. The fluorescence and 3D-rendered time lapse depicting a typical kiss and run event (Fig. 4 B), along with a frame-by-frame demonstration of the hTf-endosomal instantaneous speed with respect to its interaction with the mitochondrion.

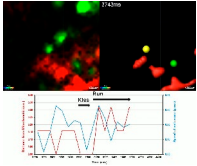

Video 7. Two other hTf-endosomal kiss and run events with respective mitochondria displaying decreasing instantaneous endosomal speeds upon interaction.

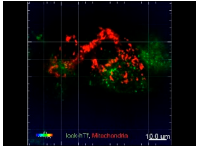

Video 8. Fluorescence, 3D-rendered, and 3D-rendered with kiss and run filtered lock-hTf-endosomes (Fig. 5 A, a-c) of MD-CK-PTR cells labeled with MitoTracker orange and 2-min pulse with AF488-lock-hTf followed by a 2-min chase.

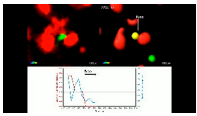

Video 9. The fluorescence and 3D-rendered time lapse depicting a typical kiss and run event (Fig. 5 B) between a lock-hTf-endosome and mitochondrion.

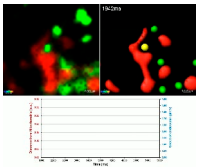

Video 10. Two other lock-hTf-endosomal kiss and run events with respective mitochondria displaying similar decreases of their instantaneous speeds.
